# Supplementary material for: A novel stabilisation model for ruthenium nanoparticles in imidazolium ionic liquids: in situ spectroscopic and labelling evidence
Source: Royal Society of Chemistry journal article supplement (doi:10.1039/b925329g), 2010-01-01
Supplement: b925329g.pdf [file b925329g.pdf]

## A Novel Stabilisation Model for Ruthenium Nanoparticles in Imidazolium Ionic Liquids: *In situ* Spectroscopic and Labelling Evidence

Paul S. Campbell, Catherine C. Santini, Denis Bouchu, Bernard Fenet, Karine Philippot, Bruno Chaudret, Agílio A. H. Pádua, and Yves Chauvin

### Electronic supplementary information

1) ESI<sup>+</sup> mass spectrum for IL<sub>2</sub> after deuterium incorporation.

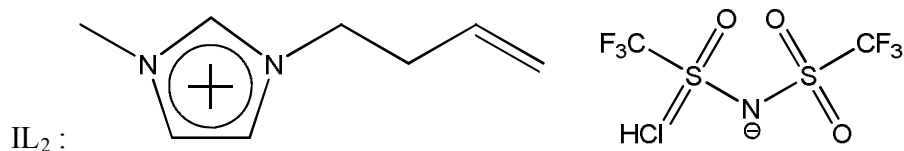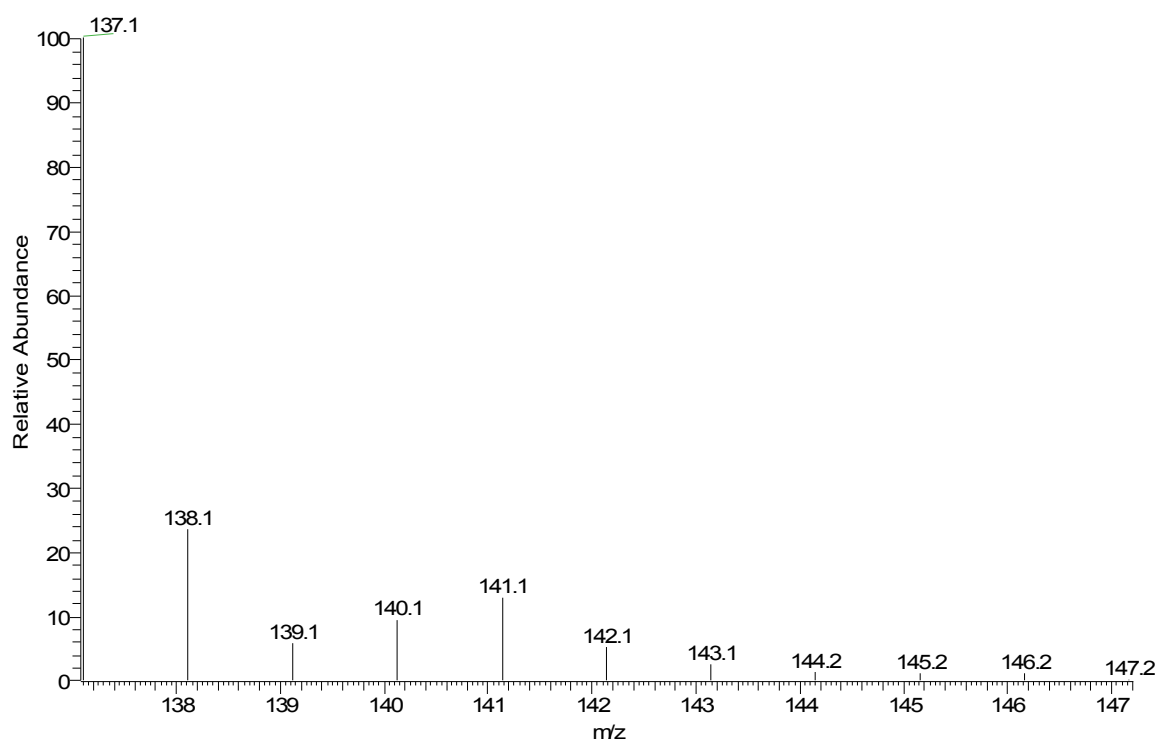

### Relative peak intensities from above spectrum

| m/z   | Intensity | Relative |
|-------|-----------|----------|
| 137.1 | 7750906.9 | 100.00   |
| 138.1 | 1824751.6 | 23.54    |
| 139.1 | 445068.6  | 5.74     |
| 140.1 | 732534.6  | 9.45     |
| 141.1 | 998252.5  | 12.88    |
| 142.1 | 401417.5  | 5.18     |
| 143.1 | 188360.9  | 2.43     |
| 144.2 | 93604.7   | 1.21     |
| 145.2 | 85572.5   | 1.10     |
| 146.2 | 85245.4   | 1.10     |
| 147.2 | 7639.2    | 0.10     |
| 148.2 | 315.9     | 0.00     |
| 149.2 | 7.7       | 0.00     |
| 150.2 | 0.1       | 0.00     |

### 2) ESI<sup>+</sup> mass spectrum for IL<sub>3</sub> after deuterium incorporation

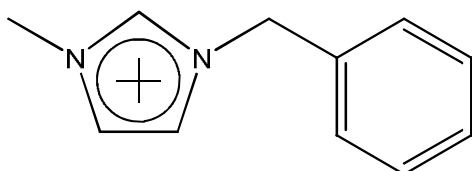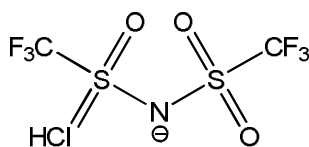

IL<sub>3</sub>:

LQQ081023-02 #143-245 RT: 2.36-2.89 AV: 103 NL: 9.98E7  
T: +c ESI Full ms [150.00-180.00]

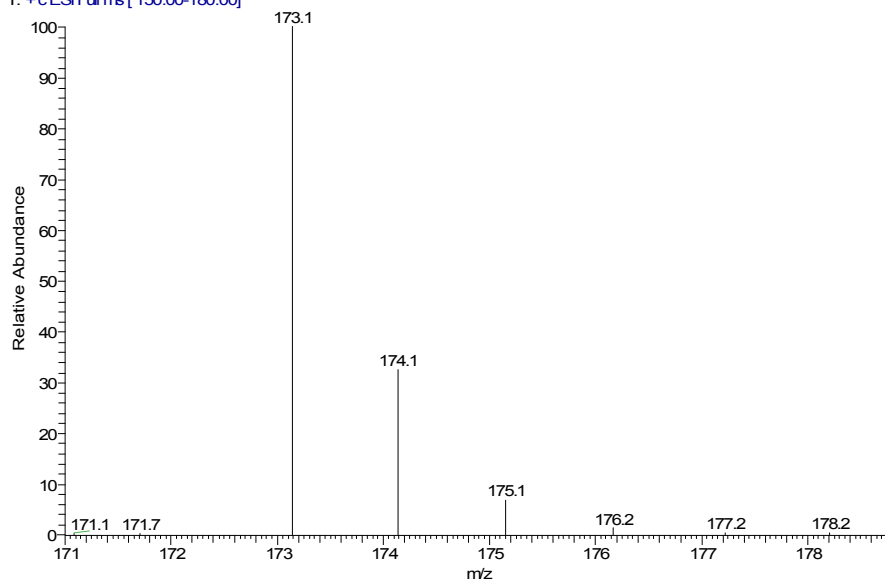

### Relative intensities of the above spectrum

| m/z   | Intensity | Relative |
|-------|-----------|----------|
| 173.1 | 7504755.5 | 100.00   |
| 174.1 | 2460646.9 | 32.79    |
| 175.1 | 473357.1  | 6.31     |
| 176.1 | 117093.6  | 1.56     |
| 177.1 | 11710.2   | 0.16     |
| 178.1 | 631.7     | 0.01     |
| 179.1 | 21.6      | 0.00     |
| 180.1 | 0.5       | 0.00     |
| 181.1 | 0.0       | 0.00     |

### ESI<sup>+</sup> spectrum – deuterated methylenecyclohexyl region

LCCQ081023-02 #674 RT: 8.03 AV: 1 NL: 1.77E5  
T: +p ESI Z ms [ 175.00-195.00]

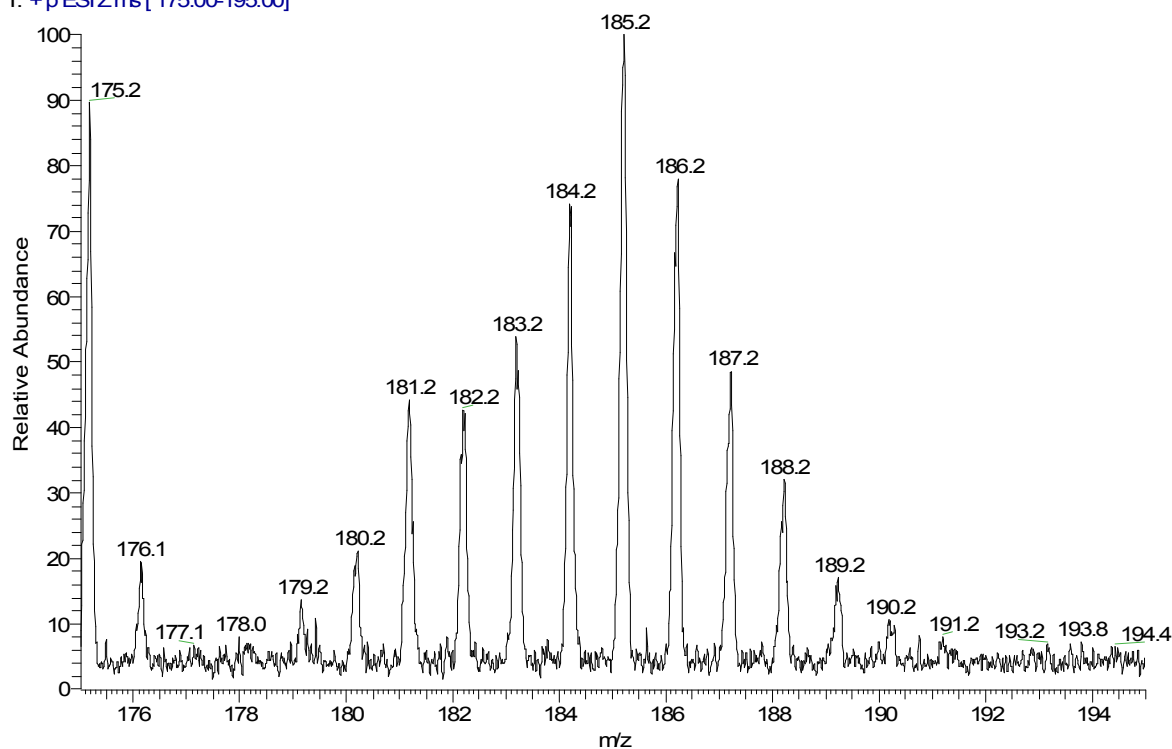

### 3) Ethylene Hydrogenation Calculations

$$pV = nRT$$

$$V_{\text{reactor}} = 125.8 \text{ cm}^3 = 1.258 \times 10^{-4} \text{ m}^3$$

$$p_r = 129 \text{ mbar} = 1.29 \times 10^4 \text{ Pa}$$

$$R = 8.314 \text{ m}^3 \text{ Pa K}^{-1} \text{ mol}^{-1}$$

$$T = 298 \text{ K}$$

$$n = (1.29 \times 10^4 \times 1.258 \times 10^{-4}) / (8.314 \times 298) \text{ m}^3 \text{ Pa m}^{-3} \text{ Pa}^{-1} \text{ K mol K}^{-1} =$$

$$6.54 \times 10^{-5} \text{ mol ethylene introduced}$$

GC calibration results:  $2.3 \times 10^{-12} \times A = \text{no. moles of C}$   
300  $\mu\text{L}$  injections =  $3 \times 10^{-7} \text{ m}^3$

Table 1: GC results following treatment under ethylene

| Species   | Ret time/ mins | Peak Area          | No. Moles of C        | No. of Moles (in 300 $\mu\text{L}$ ) | No. of Moles (in reactor) |
|-----------|----------------|--------------------|-----------------------|--------------------------------------|---------------------------|
| ethane    | 4.816          | $2.31 \times 10^4$ | $5.3 \times 10^{-8}$  | $2.7 \times 10^{-8}$                 | $1.1 \times 10^{-5}$      |
| ethylene  | 5.094          | $6.57 \times 10^4$ | $1.5 \times 10^{-7}$  | $7.6 \times 10^{-8}$                 | $3.2 \times 10^{-5}$      |
| isobutane | 8.322          | 367                | $8.4 \times 10^{-10}$ | $2.1 \times 10^{-10}$                | $8.8 \times 10^{-8}$      |
| butenes   | 10.5           | 805                | $1.9 \times 10^{-9}$  | $4.6 \times 10^{-10}$                | $1.9 \times 10^{-7}$      |

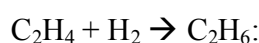

1 mole ethane produced = 1 mole  $\text{H}_2$  consumed, i.e. 2 moles of surface hydrides

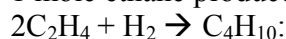

1 mole isobutane produced = 1 mole  $\text{H}_2$  consumed, i.e. 2 moles of surface hydrides

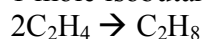

1 mole butene produced = No  $\text{H}_2$  consumed

Table 2: GC results following treatment under  $\text{H}_2$  liberating surface alkyls

| Species   | Ret time/ mins | Peak Area          | No. Moles of C       | No. of Moles (in 300 $\mu\text{L}$ ) | No. of Moles (in reactor) |
|-----------|----------------|--------------------|----------------------|--------------------------------------|---------------------------|
| methane   | 4.501          | $4.79 \times 10^3$ | $1.1 \times 10^{-8}$ | $1.1 \times 10^{-8}$                 | $4.6 \times 10^{-6}$      |
| ethane    | 4.826          | $1.69 \times 10^4$ | $3.9 \times 10^{-8}$ | $1.9 \times 10^{-8}$                 | $8.1 \times 10^{-6}$      |
| n-propane | 5.871          | $8.47 \times 10^3$ | $1.9 \times 10^{-8}$ | $6.5 \times 10^{-9}$                 | $2.7 \times 10^{-6}$      |
| n-butane  | 8.753          | $4.04 \times 10^3$ | $9.2 \times 10^{-9}$ | $2.3 \times 10^{-9}$                 | $9.7 \times 10^{-7}$      |
| n-pentane | 12.434         | 463                | $1.1 \times 10^{-9}$ | $2.1 \times 10^{-10}$                | $8.9 \times 10^{-8}$      |

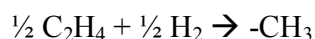

1 mole methyl produced =  $\frac{1}{2}$  mole  $\text{H}_2$  consumed, i.e. 1 mole of surface hydrides

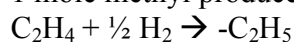

1 mole ethyl produced =  $\frac{1}{2}$  mole  $\text{H}_2$  consumed, i.e. 1 mole of surface hydrides

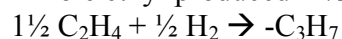

1 mole propyl produced =  $\frac{1}{2}$  mole  $\text{H}_2$  consumed, i.e. 1 mole of surface hydrides

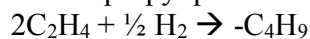

1 mole butyl produced =  $\frac{1}{2}$  mole  $\text{H}_2$  consumed, i.e. 1 mole of surface hydrides

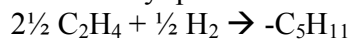

1 mole pentyl produced =  $\frac{1}{2}$  mole  $\text{H}_2$  consumed, i.e. 1 mole of surface hydrides

Total surface hydrides counted = **38  $\mu\text{mol}$**

#### Ethylene Mass balance

$6.54 \times 10^{-5} \text{ mol}$  (introduced) -  $6.02 \times 10^{-5} \text{ mol}$  (detected by GC) =  $5.2 \mu\text{mol}$  ~ 8% error

#### 4) TON calculations

Butenyl IL → butyl IL

Ru(COT)(COD) –  $2.2 \times 10^{-4}$  moles  
RuNPs,  $1.1 \pm 0.2$  nm, dispersion ~75%  
Ru<sub>s</sub> –  $1.7 \times 10^{-4}$  moles  
Butenyl IL  $7.5\text{g} / 417\text{g mol}^{-1} = 1.8 \times 10^{-2}$  moles  
15 % converted →  $2.7 \times 10^{-3}$  moles  
TON →  $2.7 \times 10^{-3}$  moles /  $1.7 \times 10^{-4}$  moles = **16**

Benzyl IL → methylenecyclohexyl IL

Ru(COT)(COD) –  $2.2 \times 10^{-4}$  moles  
RuNPs,  $3.2 \pm 0.7$  nm, dispersion ~35%  
Ru<sub>s</sub> –  $7.7 \times 10^{-5}$  moles  
Benzyl IL  $7.5\text{g} / 453\text{g mol}^{-1} = 1.7 \times 10^{-2}$  moles  
30% converted →  $4.9 \times 10^{-3}$  moles  
TON →  $4.9 \times 10^{-3}$  moles /  $7.7 \times 10^{-5}$  moles = **64**
